# Supplementary material for: Cholesterol variability and the risk of mortality, myocardial infarction, and stroke: a nationwide population-based study
Source: Oxford University Press journal article supplement (doi:10.1093/eurheartj/ehx585), 2017-09-26
Supplement: eurheartj_38_48_3560_s6.doc [file eurheartj_38_48_3560_s6.doc]

**Supplementary Tables**

**Table S1** Baseline characteristics of subjects according to the total cholesterol variability (standard deviation)

|  | Q1 (n = 914048) | Q2 (n = 914018) | Q3 (n = 914201) | Q4 (n = 914381) |
| --- | --- | --- | --- | --- |
| Age (years) | 43.4 ± 12.7 | 43.7 ± 12.0 | 44.8 ± 12.1 | 47.7 ± 12.9 |
| Sex (male) | 610279 (66.8) | 642333 (70.3) | 635652 (69.5) | 582169 (63.7) |
| Body mass index (kg/m2) | 23.3 ± 3.1 | 23.5 ± 3.0 | 23.8 ± 3.0 | 24.1 ± 3.1 |
| Systolic BP (mmHg) | 121.5 ± 14.4 | 122.2 ± 14.4 | 123.0 ± 14.6 | 124.4 ± 15.2 |
| Diastolic BP (mmHg) | 76.2 ± 9.8 | 76.8 ± 9.8 | 77.3 ± 9.8 | 77.9 ± 10.1 |
| Fasting glucose (mg/dL) | 93.3 ± 18.9 | 93.9 ± 19.7 | 94.9 ± 21.3 | 97.7 ± 25.3 |
| Mean TC (mg/dL) | 182.5 ± 29.0 | 187.5 ± 28.4 | 194.0 ± 28.7 | 205.4 ± 30.9 |
| TC variability |  |  |  |  |
| CV (%) | 4.41 ± 1.58 | 7.64 ± 1.39 | 10.41 ± 1.80 | 16.42 ± 4.97 |
| SD (mg/dL) | 7.87 ± 2.54 | 14.02 ± 1.50 | 19.78 ± 1.97 | 33.28 ± 10.17 |
| VIM (%) | 8.61 ± 3.14 | 14.86 ± 2.87 | 20.18 ± 3.73 | 31.64 ± 9.71 |
| Current smoker | 273011 (29.9) | 287752 (31.5) | 283806 (31.0) | 254617 (27.9) |
| Alcohol consumption | 512907 (56.1) | 529220 (57.9) | 518064 (56.7) | 467120 (51.1) |
| Regular exercise | 61550 (6.7) | 60889 (6.7) | 63520 (7.0) | 72903 (8.0) |
| Income (lower 10%) | 70259 (7.7) | 68875 (7.5) | 78169 (8.6) | 98154 (10.7) |
| Hypertension | 175927 (19.3) | 184151 (20.2) | 207195 (22.7) | 275909 (30.2) |
| Diabetes mellitus | 44253 (4.8) | 47704 (5.2) | 58188 (6.4) | 95988 (10.5) |
| Dyslipidaemia | 49360 (5.4) | 68047 (7.4) | 114300 (12.5) | 277435 (30.3) |
| On lipid-lowering agent | 30509 (3.3) | 35895 (3.9) | 54401 (6.0) | 154910 (16.9) |
| Any malignancy | 8459 (0.9) | 8049 (0.9) | 9169 (1.0) | 12635 (1.4) |

Data are expressed as the means ± SD, or n (%).

BP, blood pressure; CV, coefficient of variation; SD, standard deviation; TC, total cholesterol; VIM, variability independent of the mean

**Table S2** Baseline characteristics of subjects according to the total cholesterol variability (variability independent of the mean)

|  | Q1 (n = 914162) | Q2 (n = 914153) | Q3 (n = 914163) | Q4 (n = 914170) |
| --- | --- | --- | --- | --- |
| Age (years) | 44.5 ± 12.7 | 44.0 ± 11.9 | 44.4 ± 12.2 | 46.6 ± 13.2 |
| Sex (male) | 617566 (67.6) | 645709 (70.6) | 631267 (69.1) | 575891 (63.0) |
| Body mass index (kg/m2) | 23.6 ± 3.1 | 23.7 ± 3.0 | 23.7 ± 3.0 | 23.8 ± 3.1 |
| Systolic BP (mmHg) | 122.4 ± 14.6 | 122.5 ± 14.4 | 122.7 ± 14.6 | 123.4 ± 15.2 |
| Diastolic BP (mmHg) | 76.8 ± 9.9 | 77.0 ± 9.8 | 77.1 ± 9.8 | 77.3 ± 10.0 |
| Fasting glucose (mg/dL) | 94.2 ± 19.8 | 94.3 ± 20.3 | 94.7 ± 21.2 | 96.7 ± 24.4 |
| Mean TC (mg/dL) | 193.3 ± 30.6 | 192.3 ± 30.2 | 191.5 ± 30.2 | 192.3 ± 30.9 |
| TC variability |  |  |  |  |
| CV (%) | 4.26 ± 1.36 | 7.48 ± 0.78 | 10.38 ± 0.98 | 16.78 ± 4.66 |
| SD (mg/dL) | 8.24 ± 3.03 | 14.42 ± 2.89 | 19.92 ± 3.92 | 32.38 ± 10.94 |
| VIM (%) | 8.23 ± 2.64 | 14.48 ± 1.49 | 20.09 ± 1.88 | 32.48 ± 8.98 |
| Current smoker | 274456 (30.0) | 288675 (31.6) | 282431 (30.9) | 253624 (27.7) |
| Alcohol consumption | 511393 (55.9) | 528473 (57.8) | 517711 (56.6) | 469734 (51.4) |
| Regular exercise | 63825 (7.0) | 61549 (6.7) | 63137 (6.9) | 70351 (7.7) |
| Income (lower 10%) | 74357 (8.1) | 70222 (7.7) | 76886 (8.4) | 93992 (10.3) |
| Hypertension | 195401 (21.4) | 192120 (21.0) | 202283 (22.1) | 253378 (27.7) |
| Diabetes mellitus | 49311 (5.4) | 50410 (5.5) | 57217 (6.3) | 89195 (9.8) |
| Dyslipidaemia | 90949 (10.0) | 98210 (10.7) | 117227 (12.8) | 202756 (22.2) |
| On lipid-lowering agent | 44336 (4.9) | 45648 (5.0) | 57228 (6.3) | 128503 (14.1) |
| Any malignancy | 8409 (0.9) | 7935 (0.9) | 8944 (1.0) | 13024 (1.4) |

Data are expressed as the means ± SD, or n (%).

BP, blood pressure; CV, coefficient of variation; SD, standard deviation; TC, total cholesterol; VIM, variability independent of the mean

**Table S3** Hazard ratios and 95% confidence intervals of all-cause mortality, myocardial infarction and stroke by quartiles of total cholesterol variability (coefficient of variation)

|  |  | Events (n) | Follow-up duration (person-years) | Incidence rate (per 1000 person-years) | Crude | | Model 1 | Model 2 | | Model 3 |
| --- | --- | --- | --- | --- | --- | --- | --- | --- | --- | --- |
| **All-cause mortality** | | | | | | | | | | |
|  | Q1 | 18557 | 7609048 | 2.4 | 1 (ref) | | 1 (ref) | 1 (ref) | | 1 (ref) |
| Q2 | 17239 | 7612608 | 2.3 | 0.93 (0.91**-**0.95) | | **1.03 (1.01-1.06)** | **1.03 (1.01-1.05)** | | **1.03 (1.00-1.05)** |
| Q3 | 19231 | 7604753 | 2.5 | **1.04 (1.02-1.06)** | | **1.10 (1.08-1.12)** | **1.09 (1.07-1.11)** | | **1.08 (1.06-1.10)** |
| Q4 | 29598 | 7569197 | 3.9 | **1.60 (1.57-1.63)** | | **1.31 (1.29-1.34)** | **1.30 (1.28-1.33)** | | **1.25 (1.23-1.27)** |
|  | *P* for trend | |  |  | < 0.0001 | | < 0.0001 | < 0.0001 | | < 0.0001 |
| **Myocardial infarction** | | | | | | | | | | |
|  | Q1 | 9294 | 7574752 | 1.2 | 1 (ref) | | 1 (ref) | 1 (ref) | | 1 (ref) |
| Q2 | 9032 | 7579280 | 1.2 | 0.97 (0.94**-**1.00) | | **1.03 (1.00-1.06)** | **1.03 (1.00-1.06)** | | 1.03 (1.00-1.06) |
| Q3 | 9667 | 7569634 | 1.3 | **1.04 (1.01-1.07)** | | **1.07 (1.04-1.10)** | **1.07 (1.04-1.10)** | | **1.05 (1.02-1.08)** |
| Q4 | 12998 | 7521513 | 1.7 | **1.41 (1.37-1.45)** | | **1.20 (1.17-1.23)** | **1.19 (1.16-1.23)** | | **1.13 (1.10-1.16)** |
|  | *P* for trend | |  |  | < 0.0001 | | < 0.0001 | < 0.0001 | | < 0.0001 |
| **Stroke** | | | | | | | | | | |
|  | Q1 | 9632 | 7576013 | 1.3 | 1 (ref) | 1 (ref) | | 1 (ref) | 1 (ref) | |
| Q2 | 9206 | 7581311 | 1.2 | 0.96 (0.93**-**0.98) | **1.06 (1.03-1.09)** | | **1.06 (1.03-1.09)** | **1.05 (1.02-1.08)** | |
| Q3 | 10008 | 7570911 | 1.3 | **1.04 (1.01-1.07)** | **1.10 (1.07-1.13)** | | **1.09 (1.06-1.12)** | **1.07 (1.04-1.10)** | |
| Q4 | 14015 | 7522395 | 1.9 | **1.47 (1.43-1.50)** | **1.19 (1.16-1.22)** | | **1.19 (1.16-1.22)** | **1.12 (1.09-1.15)** | |
|  | *P* for trend | |  |  | < 0.0001 | < 0.0001 | | < 0.0001 | < 0.0001 | |

Model 1: adjusted for age, sex and body mass index

Model 2: adjusted for model 1 plus alcohol consumption, smoking, regular exercise and income

Model 3: adjusted for model 2 plus diabetes mellitus and hypertension

**Table S4** Hazard ratios and 95% confidence intervals of all-cause mortality, myocardial infarction and stroke by quartiles of total cholesterol variability (standard deviation)

|  |  | Events (n) | Follow-up duration (person-years) | Incidence rate (per 1000 person-years) | | Model 1 | Model 2 | | Model 3 | Model 4 |
| --- | --- | --- | --- | --- | --- | --- | --- | --- | --- | --- |
| **All-cause mortality** | | | | | | | | | | |
|  | Q1 | 18142 | 7608826 | 2.4 | | 1 (ref) | 1 (ref) | | 1 (ref) | 1 (ref) |
| Q2 | 17306 | 7610321 | 2.3 | | **1.02 (1.00-1.04)** | 1.02 (1.00-1.04) | | 1.01 (0.99-1.04) | **1.03 (1.01-1.05)** |
| Q3 | 19920 | 7602232 | 2.6 | | **1.08 (1.06-1.10)** | **1.07 (1.05-1.10)** | | **1.06 (1.04-1.08)** | **1.09 (1.07-1.12)** |
| Q4 | 29257 | 7574227 | 3.9 | | **1.24 (1.21-1.26)** | **1.22 (1.20-1.25)** | | **1.17 (1.15-1.20)** | **1.26 (1.24-1.29)** |
|  | *P* for trend | |  |  | | < 0.0001 | < 0.0001 | | < 0.0001 | < 0.0001 |
| **Myocardial infarction** | | | | | | | | | | |
|  | Q1 | 8170 | 7578739 | 1.1 | | 1 (ref) | 1 (ref) | | 1 (ref) | 1 (ref) |
| Q2 | 8463 | 7579050 | 1.1 | | **1.05 (1.02-1.09)** | **1.05 (1.02-1.08)** | | **1.05 (1.02-1.08)** | 1.02 (0.99-1.05) |
| Q3 | 9835 | 7566219 | 1.3 | | **1.14 (1.10-1.17)** | **1.13 (1.10-1.16)** | | **1.11 (1.08-1.15)** | **1.05 (1.02-1.08)** |
| Q4 | 14523 | 7521172 | 1.9 | | **1.37 (1.33-1.41)** | **1.36 (1.32-1.39)** | | **1.29 (1.25-1.32)** | **1.10 (1.07-1.13)** |
|  | *P* for trend | |  |  | | < 0.0001 | < 0.0001 | | < 0.0001 | < 0.0001 |
| **Stroke** | | | | | | | | | | |
|  | Q1 | 8783 | 7578918 | 1.2 | 1 (ref) | | 1 (ref) | 1 (ref) | | 1 (ref) |
| Q2 | 8766 | 7580506 | 1.2 | **1.06 (1.03-1.09)** | | **1.05 (1.02-1.08)** | **1.05 (1.02-1.08)** | | **1.04 (1.01-1.07)** |
| Q3 | 10278 | 7567692 | 1.4 | **1.12 (1.09-1.16)** | | **1.12 (1.09-1.15)** | **1.10 (1.07-1.13)** | | **1.08 (1.05-1.11)** |
| Q4 | 15034 | 7523515 | 2.0 | **1.25 (1.22-1.29)** | | **1.24 (1.21-1.27)** | **1.17 (1.14-1.20)** | | **1.12 (1.09-1.15)** |
|  | *P* for trend | |  |  | < 0.0001 | | < 0.0001 | < 0.0001 | | < 0.0001 |

Model 1: adjusted for age, sex and body mass index

Model 2: adjusted for model 1 plus alcohol consumption, smoking, regular exercise and income

Model 3: adjusted for model 2 plus diabetes mellitus and hypertension

Model 4: adjusted for model 3 plus mean total cholesterol level and use of lipid-lowering agent

**Table S5** Hazard ratios and 95% confidence intervals of all-cause mortality, myocardial infarction and stroke by quartiles of total cholesterol variability (variability independent of the mean)

|  |  | Events (n) | Follow-up duration (person-years) | Incidence rate (per 1000 person-years) | | Model 1 | Model 2 | | Model 3 | Model 4 |
| --- | --- | --- | --- | --- | --- | --- | --- | --- | --- | --- |
| **All-cause mortality** | | | | | | | | | | |
|  | Q1 | 18578 | 7609104 | 2.4 | | 1 (ref) | 1 (ref) | | 1 (ref) | 1 (ref) |
| Q2 | 17282 | 7612341 | 2.3 | | **1.04 (1.02-1.06)** | **1.03 (1.01-1.06)** | | **1.03 (1.01-1.05)** | **1.03 (1.01-1.05)** |
| Q3 | 19236 | 7604682 | 2.5 | | **1.10 (1.08-1.13)** | **1.10 (1.08-1.12)** | | **1.08 (1.06-1.11)** | **1.08 (1.06-1.10)** |
| Q4 | 29529 | 7569479 | 3.9 | | **1.32 (1.29-1.34)** | **1.31 (1.28-1.33)** | | **1.26 (1.23-1.28)** | **1.26 (1.24-1.28)** |
|  | *P* for trend | |  |  | | < 0.0001 | < 0.0001 | | < 0.0001 | < 0.0001 |
| **Myocardial infarction** | | | | | | | | | | |
|  | Q1 | 9401 | 7574394 | 1.2 | | 1 (ref) | 1 (ref) | | 1 (ref) | 1 (ref) |
| Q2 | 9116 | 7578761 | 1.2 | | **1.03 (1.00-1.06)** | **1.03 (1.00-1.06)** | | 1.03 (0.99-1.06) | 1.03 (0.99-1.06) |
| Q3 | 9615 | 7569701 | 1.3 | | **1.06 (1.03-1.09)** | **1.06 (1.03-1.09)** | | **1.04 (1.01-1.07)** | **1.04 (1.01-1.07)** |
| Q4 | 12859 | 7522323 | 1.7 | | **1.19 (1.16-1.22)** | **1.18 (1.15-1.21)** | | **1.12 (1.09-1.15)** | **1.08 (1.05-1.11)** |
|  | *P* for trend | |  |  | | < 0.0001 | < 0.0001 | | < 0.0001 | < 0.0001 |
| **Stroke** | | | | | | | | | | |
|  | Q1 | 9755 | 7575670 | 1.3 | 1 (ref) | | 1 (ref) | 1 (ref) | | 1 (ref) |
| Q2 | 9220 | 7580954 | 1.2 | **1.05 (1.02-1.08)** | | **1.05 (1.02-1.08)** | **1.04 (1.01-1.07)** | | **1.04 (1.01-1.07)** |
| Q3 | 9955 | 7571003 | 1.3 | **1.09 (1.06-1.12)** | | **1.08 (1.05-1.11)** | **1.06 (1.03-1.09)** | | **1.07 (1.04-1.10)** |
| Q4 | 13931 | 7523004 | 1.9 | **1.19 (1.16-1.22)** | | **1.18 (1.15-1.21)** | **1.11 (1.08-1.14)** | | **1.11 (1.08-1.14)** |
|  | *P* for trend | |  |  | < 0.0001 | | < 0.0001 | < 0.0001 | | < 0.0001 |

Model 1: adjusted for age, sex and body mass index

Model 2: adjusted for model 1 plus alcohol consumption, smoking, regular exercise and income

Model 3: adjusted for model 2 plus diabetes mellitus and hypertension

Model 4: adjusted for model 3 plus mean total cholesterol level and use of lipid lowering-agent

**Table S6** Hazard ratios and 95% confidence intervals of all-cause mortality, myocardial infarction and stroke by quartiles of total cholesterol variability (coefficient of variation): Sensitivity analysis further excluding subjects with ischaemic heart disease or cardiomyopathy.

|  |  | Events (n) | Follow-up duration (person-years) | Incidence rate (per 1000 person-years) | Model 1 | Model 2 | Model 3 | Model 4 |
| --- | --- | --- | --- | --- | --- | --- | --- | --- |
| **All-cause mortality** | | | | | | | | |
|  | Q1 | 15619 | 7146263 | 2.2 | 1 (ref) | 1 (ref) | 1 (ref) | 1 (ref) |
| Q2 | 14711 | 7173571 | 2.1 | **1.04 (1.01-1.06)** | **1.03 (1.01-1.06)** | **1.03 (1.01-1.05)** | **1.03 (1.00-1.05)** |
| Q3 | 16280 | 7126696 | 2.3 | **1.10 (1.08-1.13)** | **1.10 (1.07-1.12)** | **1.08 (1.06-1.11)** | **1.08 (1.06-1.11)** |
| Q4 | 23607 | 6864411 | 3.4 | **1.32 (1.29-1.35)** | **1.31 (1.28-1.33)** | **1.26 (1.24-1.29)** | **1.27 (1.24-1.29)** |
|  | *P* for trend | |  |  | < 0.0001 | < 0.0001 | < 0.0001 | < 0.0001 |
| **Myocardial infarction** | | | | | | | | |
|  | Q1 | 7615 | 7118383 | 1.1 | 1 (ref) | 1 (ref) | 1 (ref) | 1 (ref) |
| Q2 | 7437 | 7146289 | 1.0 | 1.02 (0.99-1.06) | 1.02 (0.99-1.06) | 1.02 (0.99-1.05) | 1.02 (0.99-1.05) |
| Q3 | 7911 | 7098316 | 1.1 | **1.06 (1.03-1.10)** | **1.06 (1.03-1.10)** | **1.05 (1.02-1.08)** | **1.05 (1.02-1.08)** |
| Q4 | 9638 | 6829527 | 1.4 | **1.16 (1.12-1.19)** | **1.15 (1.12-1.18)** | **1.10 (1.07-1.13)** | **1.07 (1.04-1.11)** |
|  | *P* for trend | |  |  | < 0.0001 | < 0.0001 | < 0.0001 | < 0.0001 |
| **Stroke** | | | | | | | | |
|  | Q1 | 7989 | 7118802 | 1.1 | 1 (ref) | 1 (ref) | 1 (ref) | 1 (ref) |
| Q2 | 7735 | 7147344 | 1.1 | **1.06 (1.03-1.10)** | **1.06 (1.03-1.09)** | **1.05 (1.02-1.09)** | **1.05 (1.02-1.09)** |
| Q3 | 8256 | 7098894 | 1.2 | **1.09 (1.06-1.12)** | **1.08 (1.05-1.12)** | **1.07 (1.03-1.10)** | **1.07 (1.04-1.10)** |
| Q4 | 10839 | 6828281 | 1.6 | **1.18 (1.15-1.22)** | **1.18 (1.14-1.21)** | **1.11 (1.08-1.14)** | **1.11 (1.08-1.15)** |
|  | *P* for trend | |  |  | < 0.0001 | < 0.0001 | < 0.0001 | < 0.0001 |

Model 1: adjusted for age, sex and body mass index

Model 2: adjusted for model 1 plus alcohol consumption, smoking, regular exercise and income

Model 3: adjusted for model 2 plus diabetes mellitus and hypertension

Model 4: adjusted for model 3 plus mean total cholesterol level and use of lipid lowering-agent

**Table S7** Hazard ratios and 95% confidence intervals of all-cause mortality, myocardial infarction and stroke by quartiles of total cholesterol variability (coefficient of variation): Sensitivity analysis excluding all subjects with hypertension, diabetes, and dyslipidaemia

|  |  | Events (n) | Follow-up duration (person-years) | Incidence rate (per 1000 person-years) | Model 1 | Model 2 | Model 3 | |  |
| --- | --- | --- | --- | --- | --- | --- | --- | --- | --- |
| **All-cause mortality** | | | | | | | | | |
|  | Q1 | 8690 | 5803429 | 1.5 | 1 (ref) | 1 (ref) | 1 (ref) | |  |
| Q2 | 8356 | 5813683 | 1.4 | **1.04 (1.01-1.07)** | **1.04 (1.01-1.07)** | **1.04 (1.01-1.07)** | |  |
| Q3 | 9017 | 5690995 | 1.6 | **1.11 (1.08-1.14)** | **1.11 (1.07-1.14)** | **1.10 (1.07-1.13)** | |  |
| Q4 | 11811 | 5141711 | 2.3 | **1.34 (1.30-1.38)** | **1.33 (1.29-1.36)** | **1.32 (1.28-1.36)** | |  |
|  | *P* for trend | |  |  | < 0.0001 | < 0.0001 | < 0.0001 | |  |
| **Myocardial infarction** | | | | | | | | | |
|  | Q1 | 4477 | 5787070 | 0.8 | 1 (ref) | 1 (ref) | 1 (ref) | |  |
| Q2 | 4400 | 5797373 | 0.8 | 1.02 (0.98-1.07) | 1.02 (0.98-1.06) | 1.02 (0.98-1.07) | |  |
| Q3 | 4501 | 5674925 | 0.8 | **1.05 (1.00-1.09)** | **1.04 (1.00-1.09)** | **1.05 (1.00-1.09)** | |  |
| Q4 | 4906 | 5123853 | 1.0 | **1.13 (1.09-1.18)** | **1.12 (1.08-1.17)** | **1.11 (1.06-1.15)** | |  |
|  | *P* for trend | |  |  | < 0.0001 | < 0.0001 | < 0.0001 | |  |
| **Stroke** | | | | | | | | | |
|  | Q1 | 3947 | 5790342 | 0.7 | 1 (ref) | 1 (ref) | | 1 (ref) |  |
| Q2 | 3880 | 5801273 | 0.7 | **1.07 (1.02-1.11)** | **1.06 (1.02-1.11)** | | **1.06 (1.02-1.11)** |  |
| Q3 | 4028 | 5677852 | 0.7 | **1.09 (1.04-1.14)** | **1.09 (1.04-1.14)** | | **1.09 (1.04-1.14)** |  |
| Q4 | 4776 | 5125944 | 0.9 | **1.19 (1.14-1.24)** | **1.18 (1.14-1.24)** | | **1.18 (1.13-1.23)** |  |
|  | *P* for trend | |  |  | < 0.0001 | < 0.0001 | | < 0.0001 |  |

Model 1: adjusted for age, sex and body mass index

Model 2: adjusted for model 1 plus alcohol consumption, smoking, regular exercise and income

Model 3: adjusted for model 2 plus mean total cholesterol level and use of lipid lowering-agent

**Table S8** Hazard ratios and 95% confidence intervals of all-cause mortality, myocardial infarction and stroke by quartiles of total cholesterol variability (coefficient of variation): Sensitivity analysis excluding subjects with the occurrence of end points within 3 years of follow-up

|  |  | Events (n) | Follow-up duration (person-years) | Incidence rate (per 1000 person-years) | Model 1 | Model 2 | Model 3 | Model 4 |
| --- | --- | --- | --- | --- | --- | --- | --- | --- |
| **All-cause mortality** | | | | | | | | |
|  | Q1 | 14223 | 7601031 | 1.9 | 1 (ref) | 1 (ref) | 1 (ref) | 1 (ref) |
| Q2 | 13138 | 7605081 | 1.7 | **1.03 (1.01-1.06)** | **1.03 (1.01-1.05)** | **1.03 (1.00-1.05)** | **1.02 (1.00-1.05)** |
| Q3 | 14707 | 7596531 | 1.9 | **1.10 (1.07-1.12)** | **1.09 (1.07-1.12)** | **1.08 (1.05-1.10)** | **1.08 (1.05-1.10)** |
| Q4 | 22190 | 7555775 | 2.9 | **1.28 (1.26-1.31)** | **1.27 (1.25-1.30)** | **1.22 (1.20-1.25)** | **1.23 (1.21-1.26)** |
|  | *P* for trend | |  |  | < 0.0001 | < 0.0001 | < 0.0001 | < 0.0001 |
| **Myocardial infarction** | | | | | | | | |
|  | Q1 | 6020 | 7569669 | 0.8 | 1 (ref) | 1 (ref) | 1 (ref) | 1 (ref) |
| Q2 | 5891 | 7574364 | 0.8 | **1.04 (1.00-1.08)** | **1.04 (1.00-1.08)** | 1.03 (0.99**-**1.07) | 1.03 (0.99**-**1.07) |
| Q3 | 6355 | 7564513 | 0.8 | **1.08 (1.05-1.12)** | **1.08 (1.04-1.12)** | **1.07 (1.03-1.11)** | **1.07 (1.03-1.11)** |
| Q4 | 8200 | 7514195 | 1.1 | **1.17 (1.13-1.21)** | **1.17 (1.13-1.20)** | **1.11 (1.07-1.15)** | **1.08 (1.05-1.12)** |
|  | *P* for trend | |  |  | < 0.0001 | < 0.0001 | < 0.0001 | < 0.0001 |
| **Stroke** | | | | | | | | |
|  | Q1 | 6745 | 7571462 | 0.9 | 1 (ref) | 1 (ref) | 1 (ref) | 1 (ref) |
| Q2 | 6507 | 7577080 | 0.9 | **1.06 (1.03-1.10)** | **1.06 (1.03-1.10)** | **1.06 (1.02-1.09)** | **1.06 (1.02-1.09)** |
| Q3 | 6964 | 7566172 | 0.9 | **1.09 (1.05-1.12)** | **1.08 (1.05-1.12)** | **1.06 (1.03-1.10)** | **1.07 (1.03-1.11)** |
| Q4 | 9654 | 7515560 | 1.3 | **1.18 (1.15-1.22)** | **1.18 (1.14-1.21)** | **1.11 (1.08-1.15)** | **1.13 (1.09-1.17)** |
|  | *P* for trend | |  |  | < 0.0001 | < 0.0001 | < 0.0001 | < 0.0001 |

Model 1: adjusted for age, sex and body mass index

Model 2: adjusted for model 1 plus alcohol consumption, smoking, regular exercise and income

Model 3: adjusted for model 2 plus diabetes mellitus and hypertension

Model 4: adjusted for model 3 plus mean total cholesterol level and use of lipid lowering-agent

**Table S9** Hazard ratios and 95% confidence intervals of all-cause mortality, myocardial infarction and stroke by quartiles of total cholesterol variability (coefficient of variation): Sensitivity analysis excluding subjects with the occurrence of end points within 5 years of follow-up

|  |  | Events (n) | Follow-up duration (person-years) | Incidence rate (per 1000 person-years) | Model 1 | Model 2 | Model 3 | | Model 4 |
| --- | --- | --- | --- | --- | --- | --- | --- | --- | --- |
| **All-cause mortality** | | | | | | | | | |
|  | Q1 | 9519 | 7581984 | 1.3 | 1 (ref) | 1 (ref) | 1 (ref) | | 1 (ref) |
| Q2 | 8857 | 7587887 | 1.2 | **1.04 (1.01-1.08)** | **1.04 (1.01-1.07)** | **1.04 (1.01-1.07)** | | **1.04 (1.01-1.07)** |
| Q3 | 9826 | 7576867 | 1.3 | **1.10 (1.07-1.13)** | **1.09 (1.06-1.13)** | **1.08 (1.05-1.11)** | | **1.08 (1.05-1.11)** |
| Q4 | 14670 | 7525485 | 2.0 | **1.27 (1.24-1.30)** | **1.26 (1.23-1.29)** | **1.21 (1.18-1.24)** | | **1.22 (1.19-1.25)** |
|  | *P* for trend | |  |  | < 0.0001 | < 0.0001 | < 0.0001 | | < 0.0001 |
| **Myocardial infarction** | | | | | | | | | |
|  | Q1 | 3972 | 7561489 | 0.5 | 1 (ref) | 1 (ref) | 1 (ref) | | 1 (ref) |
| Q2 | 3899 | 7566429 | 0.5 | 1.04 (0.99**-**1.09) | 1.04 (0.99**-**1.09) | 1.03 (0.99**-**1.08) | | 1.03 (0.99**-**1.08) |
| Q3 | 4211 | 7555860 | 0.6 | **1.09 (1.04-1.14)** | **1.09 (1.04-1.13)** | **1.07 (1.03-1.12)** | | **1.07 (1.03-1.12)** |
| Q4 | 5362 | 7502887 | 0.7 | **1.17 (1.12-1.22)** | **1.16 (1.12-1.21)** | **1.11 (1.06-1.16)** | | **1.09 (1.04-1.13)** |
|  | *P* for trend | |  |  | < 0.0001 | < 0.0001 | < 0.0001 | | 0.0005 |
| **Stroke** | | | | | | | | | |
|  | Q1 | 4381 | 7562017 | 0.6 | 1 (ref) | 1 (ref) | | 1 (ref) | 1 (ref) |
| Q2 | 4253 | 7568053 | 0.6 | **1.07 (1.02-1.11)** | **1.06 (1.02-1.11)** | | **1.06 (1.02-1.10)** | **1.06 (1.02-1.11)** |
| Q3 | 4601 | 7556714 | 0.6 | **1.10 (1.06-1.15)** | **1.10 (1.05-1.14)** | | **1.08 (1.04-1.13)** | **1.09 (1.04-1.13)** |
| Q4 | 6300 | 7502098 | 0.8 | **1.20 (1.15-1.24)** | **1.19 (1.15-1.24)** | | **1.13 (1.08-1.17)** | **1.14 (1.10-1.19)** |
|  | *P* for trend | |  |  | < 0.0001 | < 0.0001 | | < 0.0001 | < 0.0001 |

Model 1: adjusted for age, sex and body mass index

Model 2: adjusted for model 1 plus alcohol consumption, smoking, regular exercise and income

Model 3: adjusted for model 2 plus diabetes mellitus and hypertension

Model 4: adjusted for model 3 plus mean total cholesterol level and use of lipid lowering-agent

**Table S10** Hazard ratios and 95% confidence intervals of all-cause mortality, myocardial infarction and stroke by quartiles of total cholesterol variability (coefficient of variation): Sensitivity analysis confined to subjects with yearly measurements of total cholesterol

|  |  | Events (n) | Follow-up duration (person-years) | Incidence rate (per 1000 person-years) | Model 1 | Model 2 | Model 3 | | Model 4 |
| --- | --- | --- | --- | --- | --- | --- | --- | --- | --- |
| **All-cause mortality** | | | | | | | | | |
|  | Q1 | 1736 | 1426844 | 1.2 | 1 (ref) | 1 (ref) | 1 (ref) | | 1 (ref) |
| Q2 | 2990 | 2282200 | 1.3 | **1.08 (1.02-1.14)** | **1.07 (1.01-1.14)** | **1.07(1.00-1.13)** | | **1.06 (1.00-1.13)** |
| Q3 | 3269 | 2201450 | 1.5 | **1.20 (1.13-1.27)** | **1.19 (1.12-1.26)** | **1.17 (1.10-1.24)** | | **1.17 (1.10-1.24)** |
| Q4 | 3256 | 1505171 | 2.2 | **1.60 (1.51-1.70)** | **1.57 (1.48-1.67)** | **1.47 (1.39-1.56)** | | **1.48 (1.40-1.57)** |
|  | *P* for trend | |  |  | < 0.0001 | < 0.0001 | < 0.0001 | | < 0.0001 |
| **Myocardial infarction** | | | | | | | | | |
|  | Q1 | 1336 | 1421623 | 0.9 | 1 (ref) | 1 (ref) | 1 (ref) | | 1 (ref) |
| Q2 | 2248 | 2273531 | 1.0 | 1.05 (0.99**-**1.13) | 1.05 (0.98**-**1.13) | 1.04 (0.98**-**1.12) | | 1.05 (0.98**-**1.13) |
| Q3 | 2209 | 2193041 | 1.0 | 1.06 (0.99**-**1.14) | 1.06 (0.99**-**1.13) | 1.04 (0.97**-**1.11) | | 1.04 (0.97**-**1.11) |
| Q4 | 1914 | 1497767 | 1.3 | **1.26 (1.18-1.35)** | **1.25 (1.16-1.34)** | **1.16 (1.08-1.24)** | | **1.10 (1.03-1.19)** |
|  | *P* for trend | |  |  | < 0.0001 | < 0.0001 | 0.0002 | | 0.0586 |
| **Stroke** | | | | | | | | | |
|  | Q1 | 967 | 1423497 | 0.7 | 1 (ref) | 1 (ref) | | 1 (ref) | 1 (ref) |
| Q2 | 1759 | 2276181 | 0.8 | **1.13 (1.05-1.22)** | **1.13 (1.04-1.22)** | | **1.12 (1.03-1.21)** | **1.12 (1.04-1.21)** |
| Q3 | 1771 | 2195281 | 0.8 | **1.16 (1.07-1.25)** | **1.15 (1.06-1.24)** | | **1.12 (1.03-1.21)** | **1.13 (1.04-1.22)** |
| Q4 | 1493 | 1500163 | 1.0 | **1.29 (1.19-1.40)** | **1.27 (1.17-1.38)** | | **1.15 (1.06-1.25)** | **1.16 (1.07-1.27)** |
|  | *P* for trend | |  |  | < 0.0001 | < 0.0001 | | 0.0061 | 0.0028 |

Model 1: adjusted for age, sex and body mass index

Model 2: adjusted for model 1 plus alcohol consumption, smoking, regular exercise and income

Model 3: adjusted for model 2 plus diabetes mellitus and hypertension

Model 4: adjusted for model 3 plus mean total cholesterol level and use of lipid lowering-agent

**Table S11** Hazard ratios and 95% confidence intervals of all-cause mortality, myocardial infarction

and stroke by quartiles of total cholesterol variability: Time-dependent Cox regression analysis

|  |  | CV | SD | VIM |
| --- | --- | --- | --- | --- |
|  | **All-cause mortality** | | | |
|  | Q1 | 1 (ref) | 1 (ref) | 1 (ref) |
| Q2 | 1.04 (0.97-1.11) | **1.07 (1.00-1.15)** | 1.03 (0.96-1.10) |
| Q3 | **1.14 (1.07-1.22)** | **1.16 (1.08-1.23)** | **1.14 (1.07-1.22)** |
| Q4 | **1.38 (1.30-1.46)** | **1.40 (1.32-1.48)** | **1.36 (1.29-1.44)** |
|  | *P* for trend | < 0.0001 | < 0.0001 | < 0.0001 |
|  | **Myocardial infarction** | | | |
|  | Q1 | 1 (ref) | 1 (ref) | 1 (ref) |
| Q2 | 1.03 (0.90**-**1.17) | 1.03 (0.90**-**1.18) | 1.08 (0.95**-**1.23) |
| Q3 | 1.06 (0.94**-**1.21) | 1.08 (0.95**-**1.23) | 1.11 (0.98**-**1.26) |
| Q4 | **1.58 (1.41-1.76)** | **1.51 (1.34-1.69)** | **1.54 (1.38-1.72)** |
|  | *P* for trend | < 0.0001 | < 0.0001 | < 0.0001 |
|  | **Stroke** |  |  |  |
|  | Q1 | 1 (ref) | 1 (ref) | 1 (ref) |
| Q2 | 1.07 (0.95-1.21) | 1.05 (0.93-1.19) | 0.99 (0.88-1.11) |
| Q3 | **1.13 (1.01-1.27)** | 1.10 (0.98-1.24) | 1.09 (0.97-1.22) |
| Q4 | **1.48 (1.33-1.63)** | **1.44 (1.30-1.60)** | **1.37 (1.24-1.52)** |
|  | *P* for trend | < 0.0001 | < 0.0001 | < 0.0001 |

Adjusted for age, sex, body mass index, alcohol consumption, smoking, regular exercise, income,

diabetes mellitus, hypertension, mean total cholesterol level and use of lipid-lowering agent

CV, coefficient of variation; SD, standard deviation; VIM, variability independent of the mean

**Table S12** Values of total cholesterol variability indices in different age groups

|  | CV | SD | VIM |
| --- | --- | --- | --- |
| 20-39 years-old | 9.33 ± 4.88 | 17.24 ± 9.63 | 18.14 ± 9.48 |
| 40-59 years-old | 9.76 ± 5.15 | 19.21 ± 10.77 | 18.84 ± 9.94 |
| ≥60 years-old | 10.74 ± 6.36 | 21.50 ± 13.30 | 20.71 ± 12.27 |
| *P* value | < 0.0001 | < 0.0001 | < 0.0001 |

Data are expressed as the means ± SD.

CV, coefficient of variation; SD, standard deviation; VIM, variability independent of the mean

**Table S13** Hazard ratios and 95% confidence intervals of all-cause mortality by quartiles of total cholesterol variability (coefficient of variation) in different age groups

|  |  | Events (n) | Follow-up duration (person-years) | Incidence rate (per 1000 person-years) | | Model 1 | Model 2 | | Model 3 | Model 4 |
| --- | --- | --- | --- | --- | --- | --- | --- | --- | --- | --- |
| **20-39 years-old** | | | | | | | | | | |
|  | Q1 | 1307 | 3160840 | 0.41 | | 1 (ref) | 1 (ref) | | 1 (ref) | 1 (ref) |
| Q2 | 1299 | 3201582 | 0.41 | | 0.96 (0.89**-**1.03) | 0.96 (0.89**-**1.03) | | 0.96 (0.89-1.03) | 0.96 (0.89-1.03) |
| Q3 | 1433 | 3103663 | 0.46 | | **1.10 (1.02-1.18)** | **1.09 (1.02-1.18)** | | **1.09 (1.01-1.17)** | **1.09 (1.01-1.17)** |
| Q4 | 1525 | 2656689 | 0.57 | | **1.43 (1.33-1.54)** | **1.41 (1.31-1.52)** | | **1.39 (1.29-1.49)** | **1.38 (1.28-1.49)** |
|  | *P* for trend | |  |  | | < 0.0001 | < 0.0001 | | < 0.0001 | < 0.0001 |
| **40-59 years-old** | | | | | | | | | | |
|  | Q1 | 5474 | 3437402 | 1.59 | | 1 (ref) | 1 (ref) | | 1 (ref) | 1 (ref) |
| Q2 | 6180 | 3583014 | 1.72 | | **1.06 (1.02-1.10)** | **1.06 (1.02-1.10)** | | **1.06 (1.02-1.10)** | **1.06 (1.02-1.09)** |
| Q3 | 6647 | 3593917 | 1.85 | | **1.14 (1.10-1.18)** | **1.14 (1.10-1.18)** | | **1.12 (1.08-1.16)** | **1.12 (1.08-1.16)** |
| Q4 | 8640 | 3558100 | 2.43 | | **1.48 (1.43-1.53)** | **1.46 (1.41-1.51)** | | **1.37 (1.33-1.42)** | **1.38 (1.33-1.43)** |
|  | *P* for trend | |  |  | | < 0.0001 | < 0.0001 | | < 0.0001 | < 0.0001 |
| **≥ 60 years-old** | | | | | | | | | | |
|  | Q1 | 11776 | 1010806 | 11.65 | 1 (ref) | | 1 (ref) | 1 (ref) | | 1 (ref) |
| Q2 | 9760 | 828012 | 11.79 | **1.04 (1.01-1.07)** | | **1.03 (1.01-1.06)** | **1.03 (1.00-1.06)** | | **1.03 (1.00-1.06)** |
| Q3 | 11151 | 907173 | 12.29 | **1.09 (1.06-1.11)** | | **1.08(1.05-1.11)** | **1.06 (1.04-1.09)** | | **1.06 (1.04-1.09)** |
| Q4 | 19433 | 1354408 | 14.35 | **1.25 (1.22-1.28)** | | **1.24 (1.21-1.27)** | **1.19 (1.17-1.22)** | | **1.20 (1.17-1.23)** |
|  | *P* for trend | |  |  | < 0.0001 | | < 0.0001 | < 0.0001 | | < 0.0001 |

Model 1: adjusted for age, sex and body mass index

Model 2: adjusted for model 1 plus alcohol consumption, smoking, regular exercise and income

Model 3: adjusted for model 2 plus diabetes mellitus and hypertension

Model 4: adjusted for model 3 plus mean total cholesterol level and use of lipid-lowering agent

**Table S14** Hazard ratios and 95% confidence intervals of stroke by quartiles of total cholesterol variability (coefficient of variation) in different age groups

|  |  | Events (n) | Follow-up duration (person-years) | Incidence rate (per 1000 person-years) | | Model 1 | Model 2 | | Model 3 | Model 4 |
| --- | --- | --- | --- | --- | --- | --- | --- | --- | --- | --- |
| **20-39 years-old** | | | | | | | | | | |
|  | Q1 | 527 | 3159113 | 0.17 | | 1 (ref) | 1 (ref) | | 1 (ref) | 1 (ref) |
| Q2 | 624 | 3199561 | 0.20 | | **1.13 (1.01-1.27)** | **1.13 (1.01-1.27)** | | **1.13 (1.00-1.27)** | **1.13 (1.01-1.27)** |
| Q3 | 580 | 3101664 | 0.19 | | 1.09 (0.97-1.22) | 1.09 (0.96-1.22) | | 1.08 (0.96-1.21) | 1.08 (0.96-1.22) |
| Q4 | 587 | 2654785 | 0.22 | | **1.33 (1.18-1.49)** | **1.32 (1.17-1.49)** | | **1.27 (1.13-1.43)** | **1.26 (1.12-1.42)** |
|  | *P* for trend | |  |  | | < 0.0001 | < 0.0001 | | 0.0028 | 0.0011 |
| **40-59 years-old** | | | | | | | | | | |
|  | Q1 | 3427 | 3425073 | 1.00 | | 1 (ref) | 1 (ref) | | 1 (ref) | 1 (ref) |
| Q2 | 3782 | 3569672 | 1.06 | | **1.05 (1.01-1.10)** | **1.05 (1.01-1.10)** | | 1.05 (0.99-1.10) | **1.05 (1.00-1.10)** |
| Q3 | 4037 | 3579815 | 1.13 | | **1.11 (1.06-1.17)** | **1.11 (1.06-1.16)** | | **1.09 (1.04-1.14)** | **1.09 (1.04-1.14)** |
| Q4 | 4617 | 3541983 | 1.30 | | **1.23 (1.18-1.29)** | **1.22 (1.17-1.28)** | | **1.12 (1.07-1.17)** | **1.11 (1.06-1.16)** |
|  | *P* for trend | |  |  | | < 0.0001 | < 0.0001 | | < 0.0001 | < 0.0001 |
| **≥ 60 years-old** | | | | | | | | | | |
|  | Q1 | 5678 | 991828 | 5.72 | 1 (ref) | | 1 (ref) | 1 (ref) | | 1 (ref) |
| Q2 | 4800 | 812077 | 5.91 | **1.05 (1.01-1.10)** | | **1.05 (1.01-1.09)** | **1.04 (1.00-1.08)** | | **1.04 (1.00-1.08)** |
| Q3 | 5391 | 889432 | 6.06 | **1.08 (1.04-1.12)** | | **1.07 (1.04-1.12)** | **1.06 (1.02-1.10)** | | **1.06 (1.02-1.10)** |
| Q4 | 8811 | 1325627 | 6.65 | **1.16 (1.12-1.20)** | | **1.15 (1.11-1.19)** | **1.09 (1.06-1.13)** | | **1.09 (1.06-1.13)** |
|  | *P* for trend | |  |  | < 0.0001 | | < 0.0001 | < 0.0001 | | < 0.0001 |

Model 1: adjusted for age, sex and body mass index

Model 2: adjusted for model 1 plus alcohol consumption, smoking, regular exercise and income

Model 3: adjusted for model 2 plus diabetes mellitus and hypertension

Model 4: adjusted for model 3 plus mean total cholesterol level and use of lipid-lowering agent

**Table S15** Hazard ratios and 95% confidence intervals of myocardial infarction by quartiles of total cholesterol variability (coefficient of variation) in different age groups

|  |  | Events (n) | Follow-up duration (person-years) | Incidence rate (per 1000 person-years) | | Model 1 | Model 2 | | Model 3 | Model 4 |
| --- | --- | --- | --- | --- | --- | --- | --- | --- | --- | --- |
| **20-39 years-old** | | | | | | | | | | |
|  | Q1 | 1004 | 3156977 | 0.32 | | 1 (ref) | 1 (ref) | | 1 (ref) | 1 (ref) |
| Q2 | 1073 | 3197514 | 0.34 | | 1.02 (0.94-1.11) | 1.02 (0.94-1.11) | | 1.02 (0.93-1.11) | 1.02 (0.94-1.12) |
| Q3 | 1054 | 3099643 | 0.34 | | 1.04 (0.95-1.13) | 1.04 (0.95-1.13) | | 1.03 (0.94-1.12) | 1.04 (0.95-1.13) |
| Q4 | 915 | 2652999 | 0.34 | | **1.10 (1.01-1.21)** | **1.09 (1.00-1.20)** | | 1.06 (0.97-1.16) | 1.03(0.94-1.13) |
|  | *P* for trend | |  |  | | 0.0137 | 0.0247 | | 0.1640 | 0.7399 |
| **40-59 years-old** | | | | | | | | | | |
|  | Q1 | 4243 | 3420989 | 1.24 | | 1 (ref) | 1 (ref) | | 1 (ref) | 1 (ref) |
| Q2 | 4608 | 3565154 | 1.29 | | 1.03 (0.98-1.07) | 1.03 (0.99-1.07) | | 1.02 (0.98-1.07) | 1.03 (0.98-1.07) |
| Q3 | 4786 | 3575839 | 1.34 | | **1.06 (1.02-1.11)** | **1.06 (1.02-1.11)** | | **1.04 (1.00-1.09)** | 1.04 (0.99-1.09) |
| Q4 | 5572 | 3536661 | 1.58 | | **1.22 (1.17-1.27)** | **1.21 (1.16-1.26)** | | **1.13 (1.08-1.18)** | **1.08 (1.04-1.12)** |
|  | *P* for trend | |  |  | | < 0.0001 | < 0.0001 | | < 0.0001 | < 0.0001 |
| **≥ 60 years-old** | | | | | | | | | | |
|  | Q1 | 4047 | 996786 | 4.06 | 1 (ref) | | 1 (ref) | 1 (ref) | | 1 (ref) |
| Q2 | 3351 | 816613 | 4.10 | 1.03 (0.98-1.07) | | 1.02 (0.98-1.07) | 1.02 (0.97-1.06) | | 1.01 (0.97-1.06) |
| Q3 | 3827 | 894152 | 4.28 | **1.07 (1.02-1.12)** | | **1.07 (1.02-1.11)** | **1.05 (1.00-1.10)** | | 1.04 (0.99-1.09) |
| Q4 | 6511 | 1331853 | 4.89 | **1.20 (1.15-1.25)** | | **1.19 (1.15-1.24)** | **1.14 (1.09-1.18)** | | **1.08 (1.04-1.13)** |
|  | *P* for trend | |  |  | < 0.0001 | | < 0.0001 | < 0.0001 | | < 0.0001 |

Model 1: adjusted for age, sex and body mass index

Model 2: adjusted for model 1 plus alcohol consumption, smoking, regular exercise and income

Model 3: adjusted for model 2 plus diabetes mellitus and hypertension

Model 4: adjusted for model 3 plus mean total cholesterol level and use of lipid-lowering agent

**Table S16** Hazard ratios and 95% confidence intervals of all-cause mortality, myocardial infarction and stroke by quartiles of total cholesterol variability (coefficient of variation): Sensitivity analysis confined to subjects not using lipid-lowering agent

|  |  | Events (n) | Follow-up duration (person-years) | Incidence rate (per 1000 person-years) | Model 1 | Model 2 | Model 3 | | Model 4 |
| --- | --- | --- | --- | --- | --- | --- | --- | --- | --- |
| **All-cause mortality** | | | | | | | | | |
|  | Q1 | 16959 | 7252667 | 2.3 | 1 (ref) | 1 (ref) | 1 (ref) | | 1 (ref) |
| Q2 | 15649 | 7240632 | 2.2 | **1.03 (1.01,1.05)** | **1.03 (1.00,1.05)** | **1.02 (1.00,1.04)** | | 1.02 (1.00,1.04) |
| Q3 | 17218 | 7131953 | 2.4 | **1.10 (1.08,1.12)** | **1.09 (1.07,1.12)** | **1.08 (1.06,1.11)** | | **1.08 (1.06,1.10)** |
| Q4 | 23810 | 6484299 | 3.7 | **1.35 (1.32,1.37)** | **1.33 (1.31,1.36)** | **1.30 (1.28,1.33)** | | **1.29 (1.27,1.32)** |
|  | *P* for trend | |  |  | < 0.0001 | < 0.0001 | < 0.0001 | | < 0.0001 |
| **Myocardial infarction** | | | | | | | | | |
|  | Q1 | 8016 | 7223768 | 1.1 | 1 (ref) | 1 (ref) | 1 (ref) | | 1 (ref) |
| Q2 | 7729 | 7212761 | 1.1 | 1.03 (1.00,1.06) | 1.03 (0.99,1.06) | 1.02 (0.99,1.05) | | 1.02 (0.99,1.06) |
| Q3 | 7974 | 7103878 | 1.1 | **1.05 (1.01,1.08)** | **1.04 (1.01,1.08)** | **1.03 (1.00,1.07)** | | **1.04 (1.01,1.08)** |
| Q4 | 8796 | 6453188 | 1.4 | **1.11 (1.08,1.15)** | **1.11 (1.07,1.14)** | **1.08 (1.05,1.11)** | | **1.10 (1.07,1.13)** |
|  | *P* for trend | |  |  | < 0.0001 | < 0.0001 | < 0.0001 | | < 0.0001 |
| **Stroke** | | | | | | | | | |
|  | Q1 | 8397 | 7224616 | 1.2 | 1 (ref) | 1 (ref) | | 1 (ref) | 1 (ref) |
| Q2 | 8064 | 7213911 | 1.1 | **1.07 (1.04,1.10)** | **1.07 (1.03,1.10)** | | **1.06 (1.03,1.09)** | **1.06 (1.03,1.10)** |
| Q3 | 8540 | 7103781 | 1.2 | **1.10 (1.07,1.13)** | **1.10 (1.06,1.13)** | | **1.08 (1.05,1.12)** | **1.09 (1.05,1.12)** |
| Q4 | 10368 | 6450422 | 1.6 | **1.21 (1.17,1.24)** | **1.20 (1.16,1.23)** | | **1.16 (1.13,1.20)** | **1.17 (1.14,1.20)** |
|  | *P* for trend | |  |  | < 0.0001 | < 0.0001 | | < 0.0001 | < 0.0001 |

Model 1: adjusted for age, sex and body mass index

Model 2: adjusted for model 1 plus alcohol consumption, smoking, regular exercise and income

Model 3: adjusted for model 2 plus diabetes mellitus and hypertension

Model 4: adjusted for model 3 plus mean total cholesterol level

**Table S17** Hazard ratios and 95% confidence intervals of all-cause mortality, myocardial infarction and stroke by quartiles of total cholesterol variability (coefficient of variation): Sensitivity analysis confined to subjects using lipid-lowering agent

|  |  | Events (n) | Follow-up duration (person-years) | Incidence rate (per 1000 person-years) | Model 1 | Model 2 | Model 3 | | Model 4 |
| --- | --- | --- | --- | --- | --- | --- | --- | --- | --- |
| **All-cause mortality** | | | | | | | | | |
|  | Q1 | 1598 | 356382 | 4.5 | 1 (ref) | 1 (ref) | 1 (ref) | | 1 (ref) |
| Q2 | 1590 | 371976 | 4.3 | **1.08 (1.01-1.16)** | 1.07 (1.00**-**1.15) | 1.07 (1.00**-**1.15) | | 1.07 (1.00**-**1.15) |
| Q3 | 2013 | 472800 | 4.3 | 1.07 (1.00**-**1.14) | 1.06 (0.99**-**1.13) | 1.04 (0.97**-**1.11) | | 1.03 (0.97**-**1.11) |
| Q4 | 5788 | 1084898 | 5.3 | **1.15 (1.09-1.22)** | **1.15 (1.09-1.22)** | **1.09 (1.03-1.16)** | | **1.08 (1.02-1.14)** |
|  | *P* for trend | |  |  | < 0.0001 | < 0.0001 | 0.0098 | | 0.0360 |
| **Myocardial infarction** | | | | | | | | | |
|  | Q1 | 1278 | 350984 | 3.6 | 1 (ref) | 1 (ref) | 1 (ref) | | 1 (ref) |
| Q2 | 1303 | 366519 | 3.6 | 1.03 (0.96**-**1.12) | 1.03 (0.95**-**1.11) | 1.03 (0.95**-**1.11) | | 1.03 (0.95**-**1.11) |
| Q3 | 1693 | 465756 | 3.6 | 1.05 (0.98**-**1.13) | 1.05 (0.98**-**1.13) | 1.03 (0.96**-**1.11) | | 1.04 (0.97**-**1.12) |
| Q4 | 4202 | 1068325 | 3.9 | 1.04 (0.98**-**1.11) | 1.04 (0.98**-**1.11) | 0.99 (0.93**-**1.06) | | 1.00 (0.94**-**1.07) |
|  | *P* for trend | |  |  | 0.5649 | 0.5622 | 0.4729 | | 0.6030 |
| **Stroke** | | | | | | | | | |
|  | Q1 | 1235 | 351397 | 3.5 | 1 (ref) | 1 (ref) | | 1 (ref) | 1 (ref) |
| Q2 | 1142 | 367400 | 3.1 | 0.98 (0.90**-**1.06) | 0.97 (0.90**-**1.06) | | 0.97 (0.89**-**1.05) | 0.97 (0.90**-**1.05) |
| Q3 | 1468 | 467130 | 3.1 | 0.99 (0.91**-**1.06) | 0.98 (0.91**-**1.06) | | 0.96 (0.89**-**1.04) | 0.96 (0.89**-**1.04) |
| Q4 | 3647 | 1071973 | 3.4 | **0.93 (0.87-0.99)** | **0.93 (0.87-0.99)** | | **0.87 (0.82-0.93)** | **0.88 (0.82-0.94)** |
|  | *P* for trend | |  |  | 0.0730 | 0.0919 | | < 0.0001 | < 0.0001 |

Model 1: adjusted for age, sex and body mass index

Model 2: adjusted for model 1 plus alcohol consumption, smoking, regular exercise and income

Model 3: adjusted for model 2 plus diabetes mellitus and hypertension

Model 4: adjusted for model 3 plus mean total cholesterol level

**Supplementary Figures**

**Figure S1** Flow chart of the study population

n = 7,878,662

Subjects (age ≥ 20 yrs) who underwent health examination in 2007

3,708,761 subjects were excluded with less than 3 health examinations

n = 4,169,901

Subjects who underwent ≥ 3 health examinations from January 1, 2002 to December 31, 2007

390,595 subjects were excluded with missing data on at least one variable

122,658 subjects were excluded having myocardial infarction or stroke before the index year (2007)

**n = 3,656,648**

Subjects eligible for inclusion

**Followed from index year (2007) to the date of death or until Dec 31, 2015**

**Figure S2** Kaplan-Meier estimates of survival and disease-free probability by quartiles of total cholesterol variability measured as standard deviation

**
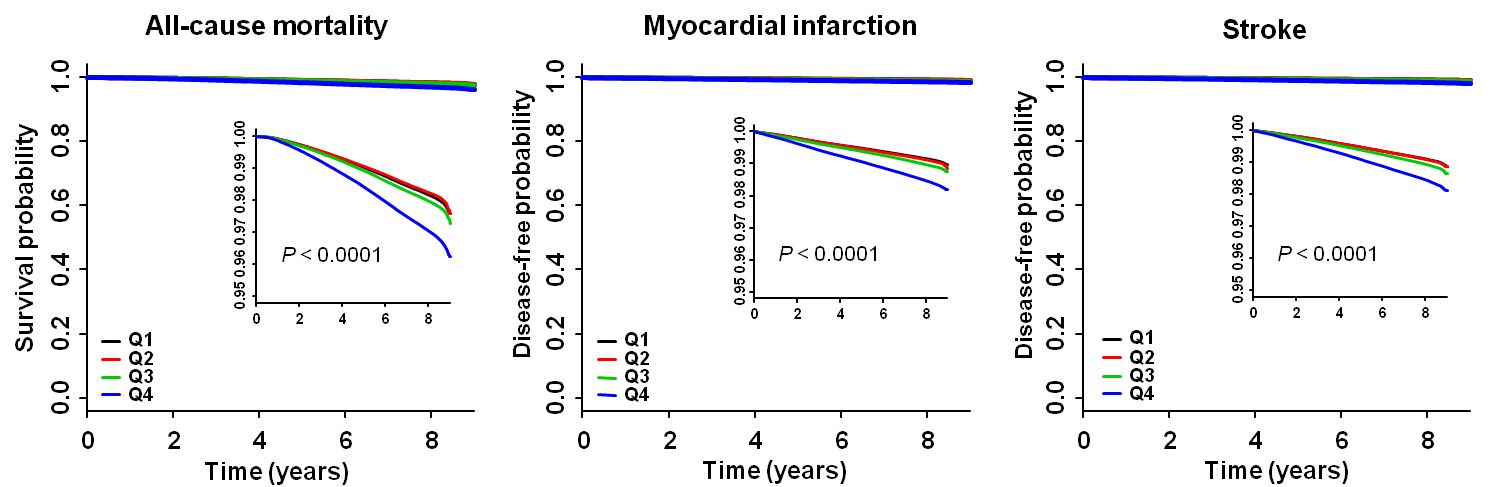
**

High resolution images are shown as an inset.

**Figure S3** Kaplan-Meier estimates of survival and disease-free probability by quartiles of total cholesterol variability measured as variability independent of the mean

**
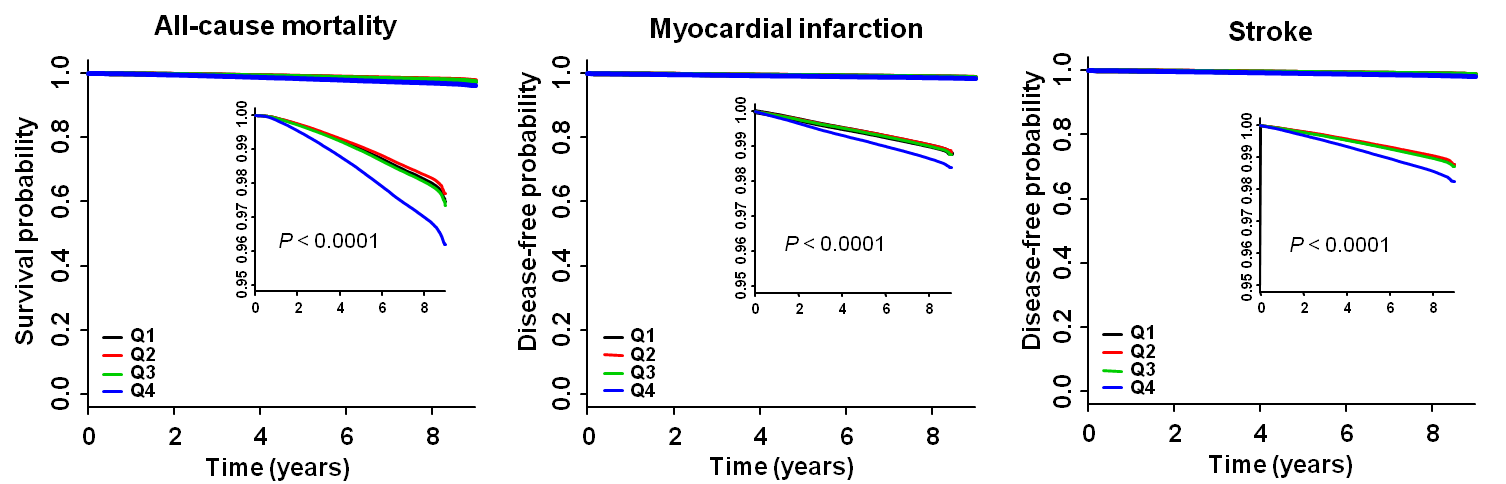
**

High resolution images are shown as an inset.

**Figure S4** Hazard ratios and 95% confidence intervals of all-cause mortality, myocardial infarction and stroke in the highest quartile vs. lower three quartiles of total cholesterol variability (standard deviation) in subgroups


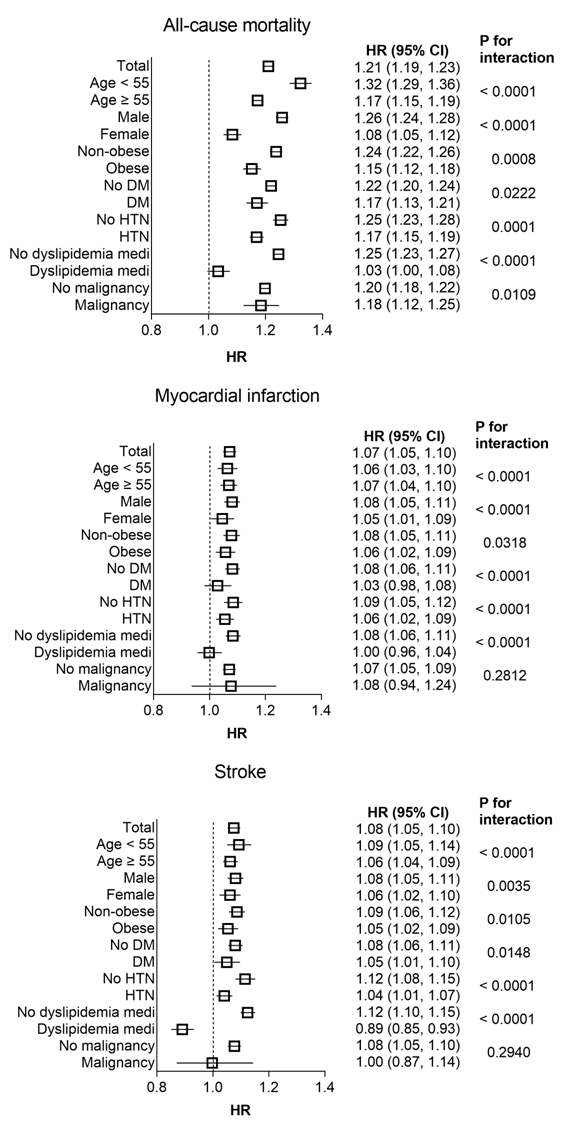


Adjusted for age, sex, body mass index, alcohol consumption, smoking, regular exercise, income, diabetes mellitus, hypertension, mean total cholesterol level and use of lipid lowering-agent

**Figure S5** Hazard ratios and 95% confidence intervals of all-cause mortality, myocardial infarction and stroke in the highest quartile vs. lower three quartiles of total cholesterol variability (variability independent of the mean) in subgroups


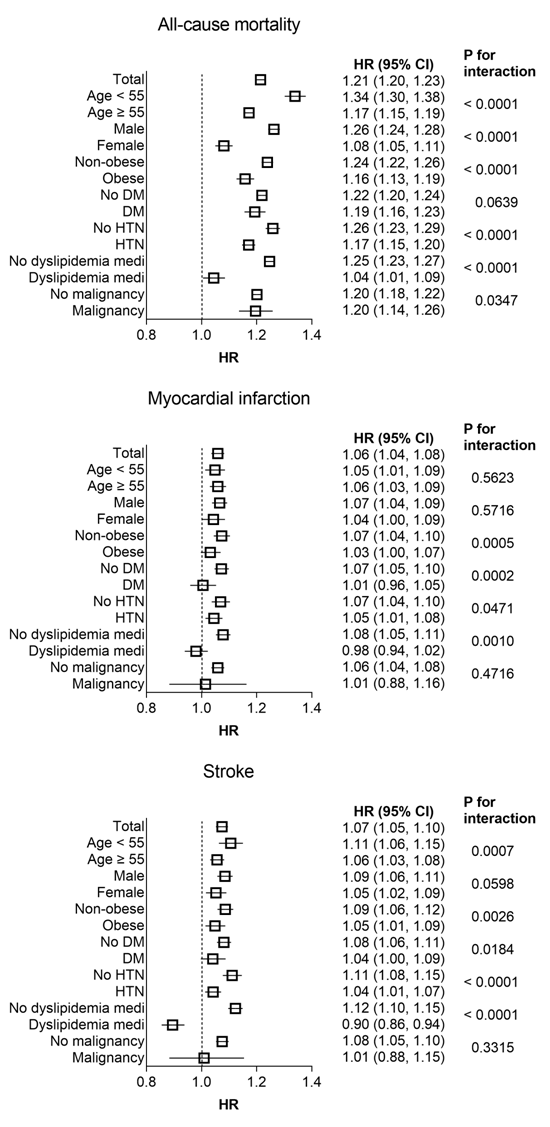


Adjusted for age, sex, body mass index, alcohol consumption, smoking, regular exercise, income, diabetes mellitus, hypertension, mean total cholesterol level and use of lipid lowering-agent
